# Supplementary material for: Effect of Tantalum Pentoxide Addition on the Radiopacity Performance of Bi2O3/Ta2O5 Composite Powders Prepared by Mechanical Milling
Source: MDPI journal article supplement (doi:10.3390/ma14237447), 2021-12-04
Supplement: s1 [file s1]

**Table S1.** Radiopacities (in mmAl) of MTA-like cements prepared by using  $(\text{Bi}_2\text{O}_3)_{100-x}(\text{Ta}_2\text{O}_5)_x$  ( $x=0, 5, 7.5, 10, 15$ , and  $20$ , i.e., B, B-5T, etc.) as radiopacifiers. Statistical analyses were presented by mean, standard deviation, and 95, 99, and 99.9% confidence intervals.

| Statistics<br>Sample | Mean | S.D. | Lower<br>95% C.I. | Upper<br>95% C.I. | Lower<br>99% C.I. | Upper<br>99% C.I. | Lower<br>99.9% C.I. | Upper<br>99.9% C.I. |
|----------------------|------|------|-------------------|-------------------|-------------------|-------------------|---------------------|---------------------|
| PC                   | 0.88 | 0.11 | 0.76              | 1.00              | 0.70              | 1.06              | 0.57                | 1.19                |
| B                    | 4.42 | 0.27 | 4.14              | 4.70              | 3.98              | 4.86              | 3.66                | 5.18                |
| B-5T                 | 5.92 | 0.07 | 5.85              | 5.99              | 5.80              | 6.04              | 5.72                | 6.12                |
| B-7.5T               | 5.34 | 0.19 | 5.14              | 5.54              | 5.03              | 5.65              | 4.81                | 5.87                |
| B-10T                | 5.13 | 0.11 | 5.01              | 5.25              | 4.95              | 5.31              | 4.82                | 5.44                |
| B-15T                | 4.39 | 0.11 | 4.27              | 4.51              | 4.21              | 4.57              | 4.08                | 4.70                |
| B-20T                | 4.63 | 0.13 | 4.49              | 4.77              | 4.42              | 4.84              | 4.27                | 4.99                |

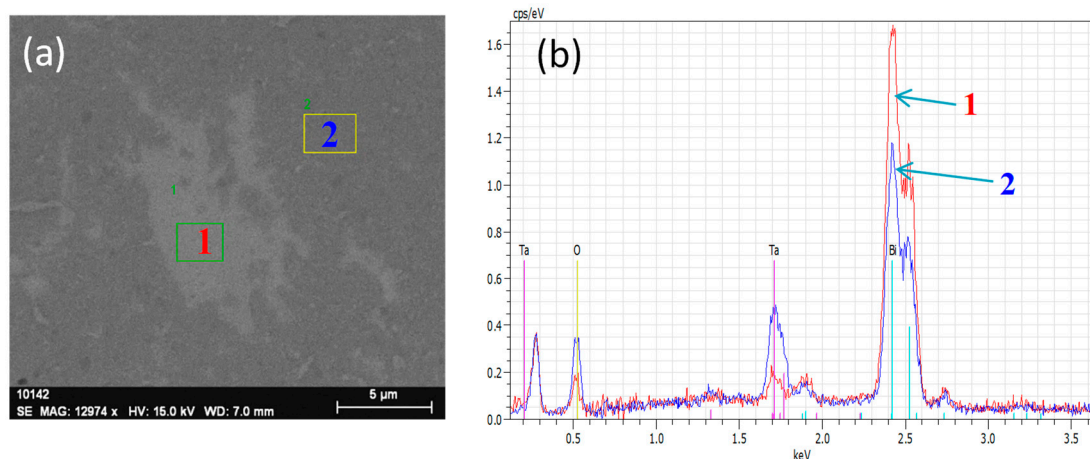

**Figure S1.** (a) SEM and (b) EDS mapping of as-milled BiTaOx powder where region 1 (relative white, red curve) was Bi-rich and region 2 was Ta-rich (the blue one)

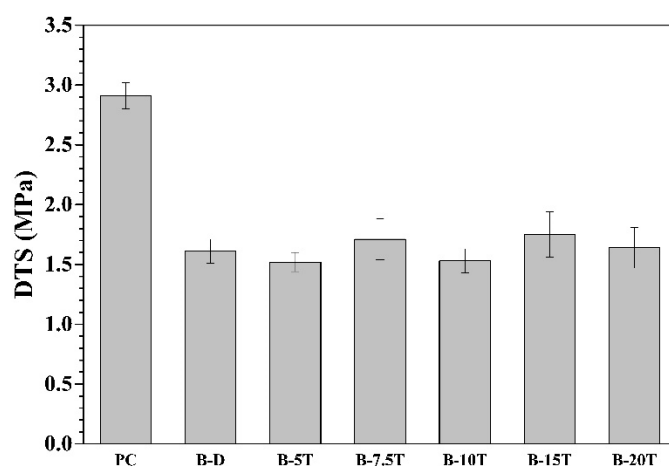

**Figure S2.** Diametral tensile strength of MTA-like cements prepared by using  $(\text{Bi}_2\text{O}_3)_{100-x}(\text{Ta}_2\text{O}_5)_x$  ( $x=0, 5, 7.5, 10, 15$ , and  $20$ , i.e., B, B-5T, etc.) as radiopacifiers.
